# Supplementary material for: Initiation of LPS-induced pulmonary dysfunction and its recovery occur independent of T cells
Source: Springer Nature journal article supplement (doi:10.1186/s12890-018-0741-2), 2018-11-22

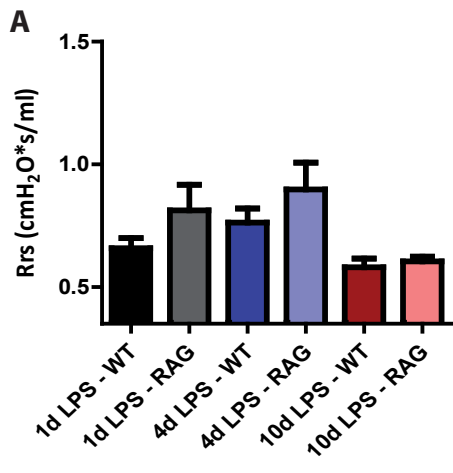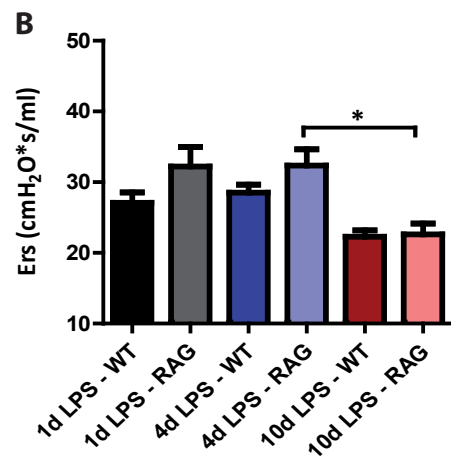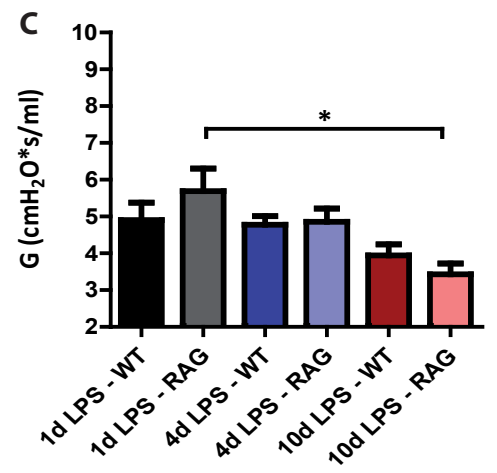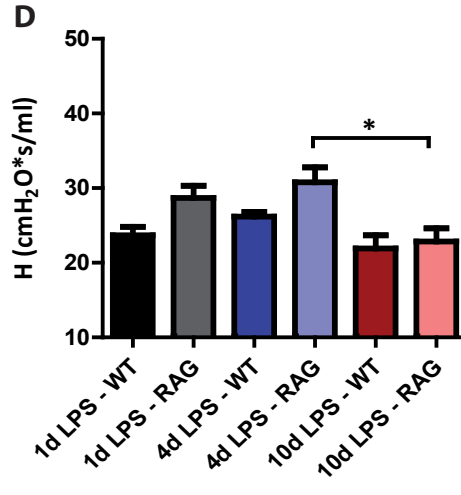

Supplement: MOESM2 [file 16288632]
